# Supplementary material for: Clinical validation of Ki67 by quantitative reverse transcription-polymerase chain reaction (RT-PCR) in HR+/HER2- early breast cancer
Source: PubMed Central journal article supplement — J Cancer. 2019 Jan 29;10(5):1110–6. doi: 10.7150/jca.29337 (PMC6400683; doi:10.7150/jca.29337), 2019-01-29

**Table S1.** Distributions of Patient and Tumor Characteristics in Cohort 1 and Cohort 2 by R function

sample()

| Characteristics            | R function sample() |             |         |
|----------------------------|---------------------|-------------|---------|
|                            | Cohort 1            | Cohort 2    | p value |
| Age, median (range), years | 57 (24-92)          | 56 (26-93)  |         |
| Pathology, No. (%)         |                     |             | 0.43    |
| IDC                        | 552 (87.6%)         | 540 (85.9%) |         |
| ILC                        | 22 (3.5%)           | 31 (4.9%)   |         |
| Others                     | 56 (8.9%)           | 58 (9.2%)   |         |
| Tumor Size, No. (%)        |                     |             | 0.51    |
| pT1                        | 435 (69.0%)         | 415 (66.0%) |         |
| pT2-3                      | 175 (27.8%)         | 192 (30.5%) |         |
| pTx                        | 20 (3.2%)           | 22 (3.5%)   |         |
| Nodal status, No. (%)      |                     |             | 0.25    |
| pN0-mic                    | 540 (85.7%)         | 551 (87.6%) |         |
| pN1                        | 88 (14.0%)          | 73 (11.6%)  |         |
| pNx                        | 2 (0.3%)            | 5 (0.8%)    |         |
| Grade, No. (%)             |                     |             | 0.33    |
| G1-2                       | 419 (76.0%)         | 399 (73.5%) |         |
| G3                         | 132 (24.0%)         | 144 (26.5%) |         |
| ER expression, No. (%)     |                     |             | 0.29    |
| <50%                       | 54 (8.6%)           | 65 (10.3%)  |         |
| ≥50%                       | 576 (91.4%)         | 564 (89.7%) |         |
| PR expression, No. (%)     |                     |             | 0.79    |
| <20%                       | 234 (37.1%)         | 229 (36.4%) |         |
| ≥20%                       | 396 (62.9%)         | 400 (63.6%) |         |
| Ki67 by IHC, No. (%)       |                     |             | 0.84    |

|                                  |             |             |      |
|----------------------------------|-------------|-------------|------|
| ≤14%                             | 331 (52.5%) | 327 (52.0%) |      |
| >14%                             | 299 (47.5%) | 302 (48.0%) |      |
| Ki67 by RT-PCR, No. (%)          |             |             | 0.15 |
| ≤5.68                            | 418 (66.3%) | 393 (62.5%) |      |
| >5.68                            | 212 (33.7%) | 236 (37.5%) |      |
| Intrinsic subtype, No. (%)       |             |             | 0.62 |
| Luminal A-like                   | 197 (31.3%) | 205 (32.6%) |      |
| Luminal B-like                   | 433 (68.7%) | 424 (67.4%) |      |
| Recurrence Score result, No. (%) |             |             | 0.81 |
| <11                              | 51 (8.1%)   | 50 (7.9%)   |      |
| 11-25                            | 309 (49.0%) | 298 (47.4%) |      |
| >26                              | 270 (42.9%) | 281 (44.7%) |      |
| Adjuvant chemotherapy, No. (%)   |             |             | 0.59 |
| Received                         | 323 (51.4%) | 313 (49.8%) |      |
| Not received                     | 306 (48.6%) | 315 (50.2%) |      |

---

**Table S2.** Kaplan-Meier Estimates of Disease-free Survival at 3 Years According to Ki67 by IHC and by RT-PCR in Cohort 1 and Cohort 2 by R Function Sample()

| Biomarker                                  | 3-year estimated DFS |                 | LR- $\Delta\chi^2$ | Log-rank<br>p |
|--------------------------------------------|----------------------|-----------------|--------------------|---------------|
|                                            | Low expression       | High expression |                    |               |
| <b>(1) Cohort 1</b>                        |                      |                 |                    |               |
| Ki67 by RT-PCR ( $\leq 5.68$ vs $> 5.68$ ) | 97.6%                | 89.4%           | 16.43              | <0.001        |
| Ki67 by RT-PCR ( $\leq 5.69$ vs $> 5.69$ ) | 96.9%                | 90.3%           | 12.12              | <0.001        |
| <b>(2) Cohort 2</b>                        |                      |                 |                    |               |
| Ki67 by RT-PCR ( $\leq 5.68$ vs $> 5.68$ ) | 96.3%                | 91.3%           | 3.72               | 0.053         |
| Ki67 by RT-PCR ( $\leq 5.69$ vs $> 5.69$ ) | 96.3%                | 91.3%           | 3.73               | 0.053         |

**Table S3.** Univariate Cox Proportional Hazards Analyses for Disease-free Survival in Cohort 1 and Cohorts 2 by R function sample()

| Variables           | coding         | HR    | 95%CI |       | p                |
|---------------------|----------------|-------|-------|-------|------------------|
|                     |                |       | Lower | Upper |                  |
| <b>(1) Cohort 1</b> |                |       |       |       | <b>&lt;0.001</b> |
| Ki67 by RT-PCR      | >5.68 vs ≤5.68 | 3.673 | 1.876 | 7.193 |                  |
| <b>(2) Cohort 2</b> |                |       |       |       | <b>0.011</b>     |
| Tumor stage         | T2-3 vs T1     | 2.228 | 1.205 | 4.119 |                  |

**Figure S1** Kaplan-Meier Estimates of Disease-free Survival by Ki67 Expression by RT-PCR in Cohorts

divided by R function sample()

Using 5.68 as Cut Point, Disease-free Survival by RT-PCR Assessment of Ki67 in Cohort 1 (A), and in

Cohort 2 (B). Using 5.69 as Cut Point, Disease-free Survival by RT-PCR Assessment of Ki67 in Cohort 1

(C), and in Cohort 2 (D).

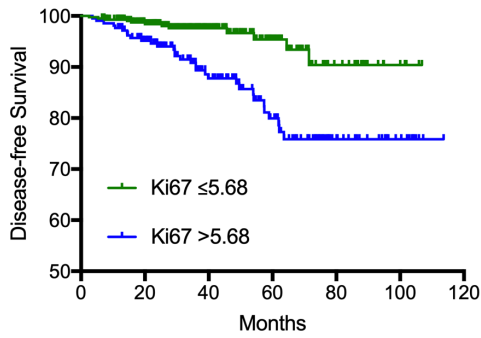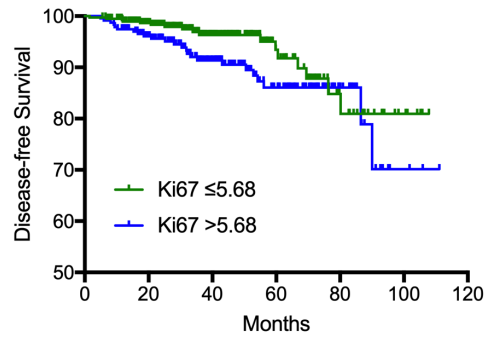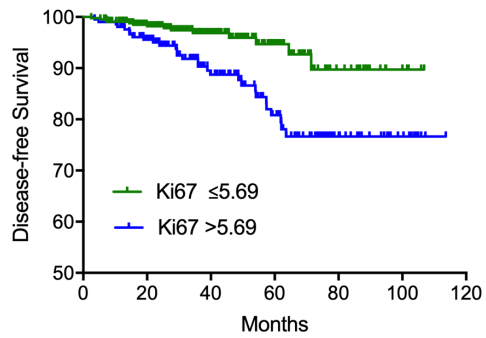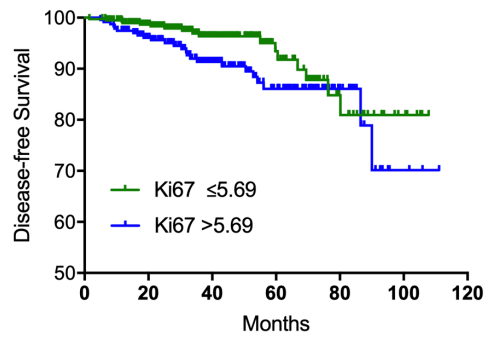

Supplement: jcav10p1110s1.pdf [file jcav10p1110s1.pdf]
